1 **Title**

2 NeuroRehabilitation OnLine (NROL): Description of a multidisciplinary group  
3 telerehabilitation innovation for stroke and neurological conditions using the TIDieR  
4 checklist

5 **Authors**

6 Suzanne Ackerley<sup>1,2</sup> ([sackerley@uclan.ac.uk](mailto:sackerley@uclan.ac.uk)), Neil Wilson<sup>1</sup> ([nwilson9@uclan.ac.uk](mailto:nwilson9@uclan.ac.uk)), Paul  
7 Boland<sup>1</sup> ([pboland2@uclan.ac.uk](mailto:pboland2@uclan.ac.uk)), Rosemary Peel<sup>3</sup> ([rosemary.peel@mbht.nhs.uk](mailto:rosemary.peel@mbht.nhs.uk)), Louise  
8 Connell<sup>1,2</sup> ([laconnell@uclan.ac.uk](mailto:laconnell@uclan.ac.uk)).

9 <sup>1</sup>University of Central Lancashire, Preston, Lancashire, UK

10 <sup>2</sup> East Lancashire Hospitals NHS Trust, Burnley, Lancashire, UK

11 <sup>3</sup> University Hospitals of Morecambe Bay NHS Foundation Trust

12 **Corresponding author**

13 Louise Connell, School of Sport and Health Sciences, University of Central Lancashire, UK. E-  
14 mail: [laconnell@uclan.ac.uk](mailto:laconnell@uclan.ac.uk)

15

16 **Abstract**

17 Background

18 Providing recommended amounts of rehabilitation for stroke and neurological patients is  
19 challenging. Telerehabilitation is viable for delivering rehabilitation and an acceptable adjunct  
20 to in-person therapy. NeuroRehabilitation OnLine (NROL) was developed as a pilot and  
21 subsequently operationalised as a regional innovation embedded across four National Health  
22 Service (NHS) Trusts.

23  
24 Objective

25 To describe the NROL innovation to assist future implementation and replication efforts.

26  
27 Methods

28 The Template for Intervention Description and Replication (TIDieR) checklist, with guidance  
29 from the TIDieR-Telehealth extension, was used to describe NROL. The description was  
30 developed collaboratively by clinical academics, therapists, managers, and researchers.  
31 Updated Consolidated Framework for Implementation Research domains were used to  
32 describe the context in which the innovation was delivered.

33  
34 Results

35 NROL delivers online group-based real-time neurorehabilitation with technology assistance  
36 provided, incorporating multidisciplinary targeted therapy and peer support. Procedures,

37 materials and structure are detailed to demonstrate how NROL is embedded within a  
38 healthcare system. NROL uses existing NHS therapy workforce alongside dedicated NROL  
39 roles, including an essential technology support role. Selection of NROL groups is dependent  
40 on patient need. The NROL innovation is modified over time in response to patient and staff  
41 feedback. NROL described here is situated within a regional stroke and neurorehabilitation  
42 network in North-West England, aligns with local and national strategies, and capitalises on  
43 an existing clinical-academic partnership.

#### 44 45 Conclusion

46 This comprehensive description of a regional NROL innovation, and clarification of core  
47 components, should facilitate other healthcare settings to adapt and implement NROL for  
48 their context. Continuous evaluation alongside implementation will ensure maximal impact  
49 for neurorehabilitation.

50

51

52

53

## 54 **Background**

55 Despite a wealth of evidence that greater amounts of rehabilitation can improve outcomes  
56 (1-4) providing stroke and brain injury patients with the recommended amount of therapy  
57 remains a clinical and workforce challenge (5). Increasing access to and opportunity for  
58 therapy is a critical step to addressing shortfalls in therapy intensity and ideally needs to be  
59 feasible with limited workforce resources.

60 Telerehabilitation, the provision of rehabilitation remotely via telecommunication devices,  
61 has developed as a viable complement to in-person therapy and offers one possible solution  
62 to help mitigate challenges. It can deliver conventional in-person therapies online with  
63 equivalent outcomes (5-10) and with similar attendance levels and acceptability to patients  
64 (11). Patients and staff report advantages in terms of saving time, energy and travel (12-14).  
65 Although not a new approach, rapid expanded adoption of telerehabilitation in routine  
66 practice was spurred by the COVID-19 pandemic (15-18), with further encouraging data  
67 collected during this time (14, 19-21). In the UK and Ireland, clinical guidelines for stroke  
68 rehabilitation now recommend the provision of therapist monitored, patient-centred remote  
69 rehabilitation programmes alongside conventional in-person therapy (22).

70

71 A group-based real-time telerehabilitation innovation for patients with acquired brain injury  
72 was developed and piloted in London, UK, entitled NROL (NeuroRehabilitation OnLine). This  
73 standalone version of NROL demonstrated positive impacts on patient-reported outcomes  
74 (20). NROL was subsequently adapted and operationalised within the UK National Health  
75 Service (NHS) by embedding a recurring six-week multidisciplinary group-based

76 telerehabilitation innovation into an existing service. Implementation with concurrent  
77 evaluation at a single NHS Trust level yielded positive results, demonstrating favourable  
78 patient and staff opinion, sustainable staffing and resource efficiencies with good clinical  
79 outcomes for patients (14). NROL was then expanded into a regional innovation involving four  
80 NHS Trusts in the North-West of England aligning to the NHS new Integrated Care System  
81 structure to work collaboratively across regions. It remains part of a hybrid approach to  
82 service delivery to complement in-person rehabilitation. NROL is acknowledged as an  
83 exemplar initiative for delivering remote rehabilitation (22).

84 Despite the successful development of NROL, as yet it has only been described in its  
85 standalone version (20) with no descriptive detail available for the current regional, multi-site  
86 model. The Template for Intervention Description and Replication (TIDieR) checklist specifies  
87 criteria for the reporting of complex interventions (23). This article describes the NROL  
88 innovation developed for regional use within an existing healthcare service using the TIDieR  
89 checklist guidance, with the aim of assisting future implementation and replication efforts.

## 90 **Methods**

91 This article describes NROL using the 12-items of the TIDieR checklist (23) and incorporates  
92 guidance from the TIDieR-Telehealth extension, providing telehealth-specific criteria for  
93 effective description of telehealth interventions (24). Checklist details were developed  
94 iteratively and collaboratively, with input from staff involved in NROL implementation and  
95 evaluation including clinical academics, therapists, managers, and researchers. Initially,  
96 individual TIDieR checklists describing each NROL group in a high level of detail were  
97 produced. These informed development of NROL staff manual and standard operating  
98 procedure documents. Finally, we abstracted from these documents to develop a

99 superordinate TIDieR checklist, aimed at describing NROL as a delivery method within an  
100 existing healthcare system for application at a regional level.

101 Given the extensive interplay between an innovation and context, the settings in which NROL  
102 was implemented are described according to the domains of the updated Consolidated  
103 Framework for Implementation Research (CFIR) (25).

104

## 105 **Results**

### 106 ***Item 1: Intervention (innovation) name***

107 NeuroRehabilitation OnLine (NROL)

### 108 ***Item 2: Why***

109 The purpose of NROL is to increase access and opportunity to neurorehabilitation for adult  
110 patients actively receiving community stroke and neurorehabilitation services within an  
111 existing healthcare system. NROL utilises an online delivery platform offering potential  
112 advantages to staff and patients in terms of saving time, energy and travel, and enabling  
113 delivery of more therapy to more people using an existing therapy workforce (14). Readily  
114 accessible technology assistance to learn how to use the required technology and help  
115 overcome barriers is important for optimising inclusivity and meeting the needs of this patient  
116 population (26-28).

117 NROL delivers group-based therapy. Group rehabilitation formats can help maximise patient  
118 contacts and staffing efficiencies whilst capitalising on the psychosocial benefits of peer  
119 support opportunities (20, 29). Peer-based interventions are viewed positively by those with

120 acquired brain injury and neurological conditions (30, 31), and peer support elements are  
121 recommended for interventions in stroke (32). Favourable evidence supports the use of group  
122 therapy for the aspects of neurorehabilitation included within NROL (29, 33, 34).

123 NROL was embedded within an existing system (NHS), rather than being standalone, to  
124 support a sustainable service delivery model that could augment rehabilitation provision. The  
125 innovation aligns with strategic priorities at a local and national level. For example, NHS  
126 England recommend using data and digital technologies, making the most effective use of  
127 resources and establishing collaborative systems, as encompassed by NHS priorities and the  
128 National Stroke Service Model (35, 36).

129 This TIDieR checklist describes NROL encompassing a regional approach involving four NHS  
130 Trusts in the North-West of England. Cross-organisational working should allow a critical mass  
131 of patients for groups where impairment incidence is relatively low (i.e., dysphasia group) and  
132 a collective use of workforce. Collaborative working should also enable a community of  
133 practice and shared learning.

134

135

136 ***Item 3: What (materials) and Item 4: What (procedures)***

137 The materials and the procedures for NROL were developed for remote delivery. They will be  
138 described together for the entry, delivery and exit of the 6-week NROL programme and are  
139 depicted in Figure 1. A secure 'NROL hub' collaboration platform (in MS Teams) was created  
140 as a repository for shared NROL information and resources. Key documents include a 'NROL  
141 standard operating procedure (SOP)' and relevant organisational and governance approvals

142 (e.g., Data Protection Impact Assessment). NROL was branded with a logo used widely on staff  
143 and patient-facing documentation, and t-shirts worn by NROL group facilitators and  
144 technology support to increase visibility and establish a sense of a cohesive team.

145

146 **Figure 1**

147

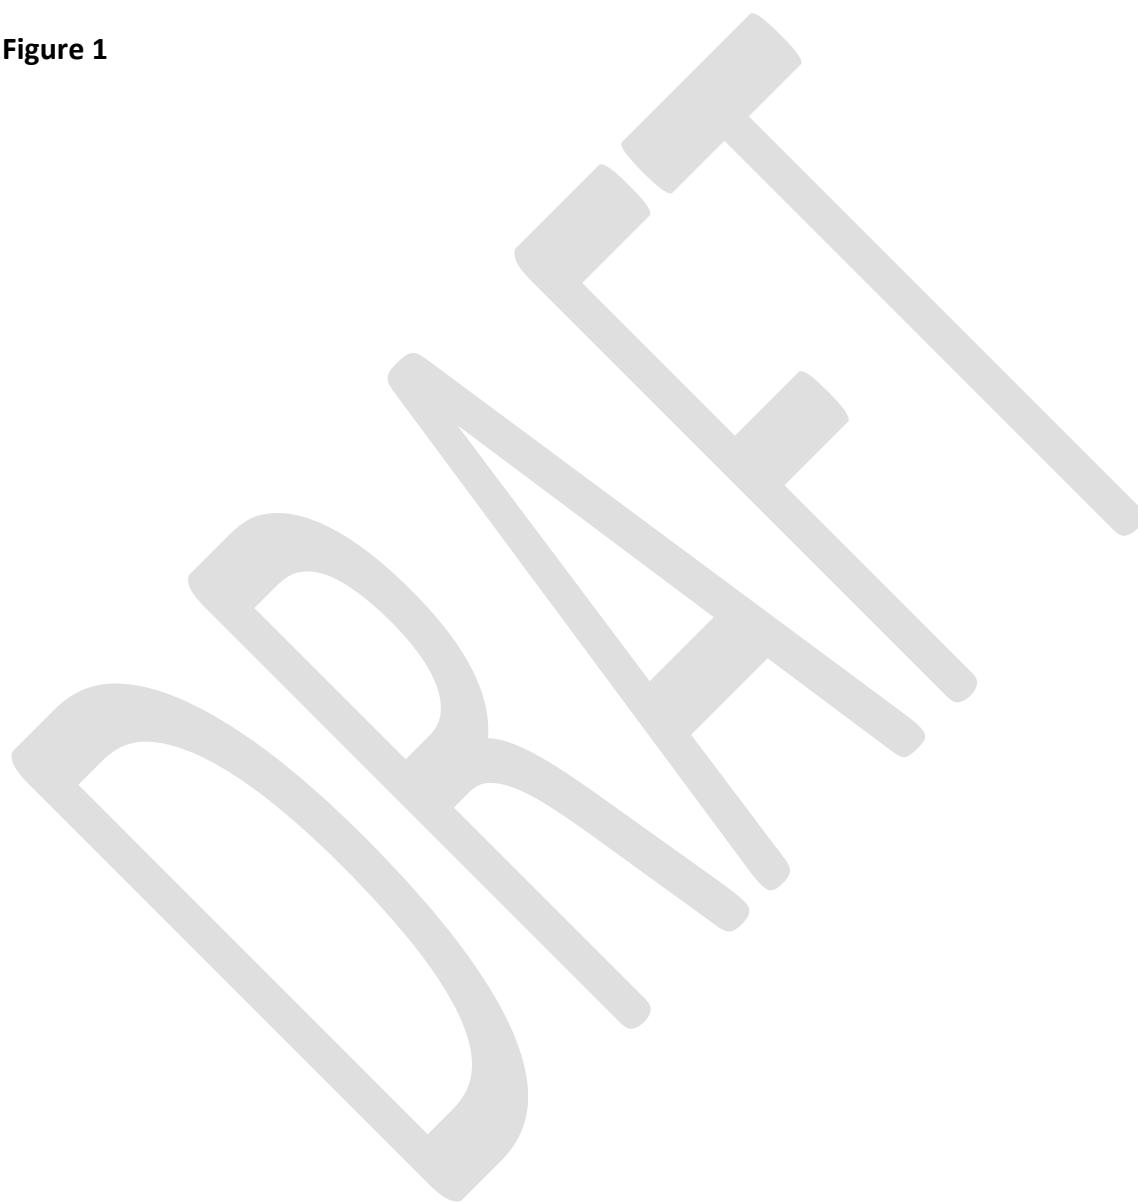



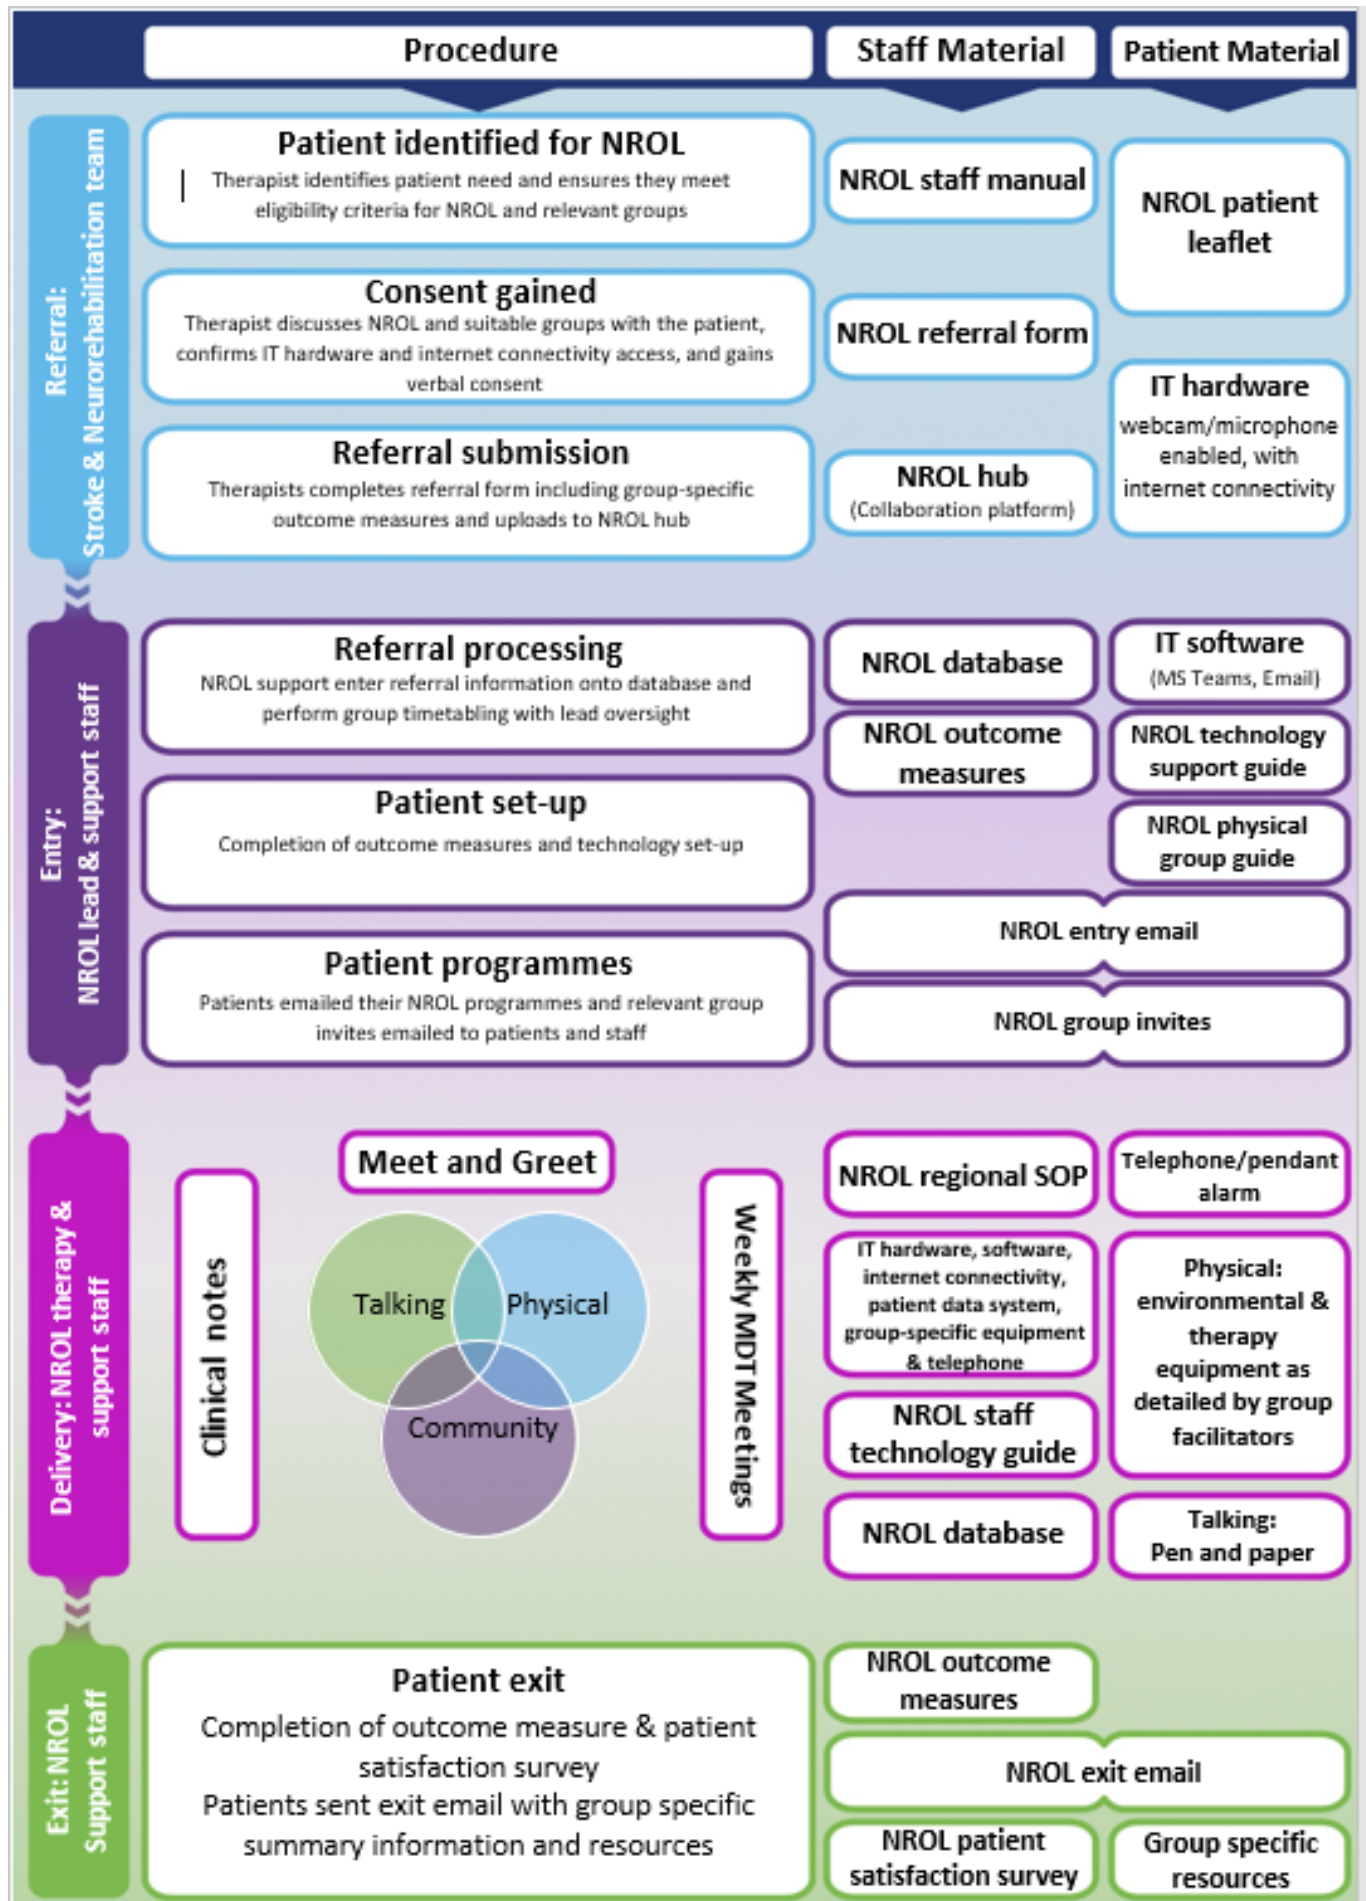

## 149 **NROL entry materials and procedures**

150 Patients under the care of stroke and neurorehabilitation services with adequate access to  
151 computer hardware and connectivity are eligible for entry to NROL. The NROL staff manual  
152 provides guidance to help therapy team members identify suitable patients. This living  
153 (continually edited and updated) 'NROL staff manual' provides an overview of NROL, group  
154 information and eligibility criteria, and referral process detail (see Supplementary file).  
155 Therapy team members discuss NROL with their patient and gain verbal consent for their  
156 participation in specified groups. A 'NROL patient leaflet' can be given to patients to  
157 complement verbal information. Eligible, consenting patients are referred to NROL using a  
158 'NROL referral form'.

159  
160 Therapy team members submit the NROL referral form to the NROL hub. NROL support staff  
161 enter referral form information onto a 'NROL database' (MS Excel), a document used to  
162 collate patient demographic and service information, complete timetabling and document  
163 technology assistance.

164  
165 Prior to programme start, a NROL staff member contacts new patients to administer 'NROL  
166 outcome measures', currently including the EQ-5D-5L for measuring health-related quality of  
167 life (37), the Stroke Self-Efficacy Questionnaire (SSEQ) for measuring self-efficacy (38)  
168 (modified for use with other neurological conditions), and the Patient Specific Functional  
169 Scale (PSFS) for measuring activity performance (39). A NROL technology support staff  
170 member completes a technology set-up with each patient to ensure they have the correct  
171 equipment (e.g., IT hardware and software (MS Teams, email), connectivity, group-specific  
172 requirements) and a suitable home environment to take part in their specified groups. A

173 'NROL technology support guide' can be provided to patients for written guidance. Patients  
174 admitted to physical groups are provided with a 'NROL physical group guide' describing what  
175 they need, and how to set up their environment and webcam to safely perform exercises.  
176 Patients receive a 'NROL entry email' detailing their personalised NROL 6-week programme,  
177 which is also sent to the referrer. Relevant group invites are sent to patients and staff.

178

### 179 **NROL delivery materials and procedures**

180 Patients join NROL groups according to their personalised programme. Current groups are  
181 described in the NROL staff manual (Supplementary file). Targeted therapy groups can include  
182 'physical' groups involving exercise or upper limb rehabilitation led by physiotherapy and  
183 occupational therapy staff, and 'talking' groups including cognitive rehabilitation, living well,  
184 fatigue management or communication therapy, led by occupational therapy, psychology and  
185 speech and language therapy staff. Many of the groups are jointly led by more than one  
186 discipline. Targeted therapy groups encompass interactive, educational, and practical  
187 elements. In addition, community groups are offered to all patients and include an  
188 introduction to NROL (Meet and Greet) and an optional weekly peer support group (Café  
189 NROL). Patients are sent a prompt (i.e., text, email) in the first two weeks of their programme  
190 to assist attendance. Technology assistance is available to patients and staff during each NROL  
191 session. Throughout the programme if a patient is expected in a group but does not join, the  
192 NROL technology support staff member makes contact to offer assistance.

193

194 NROL is delivered online (MS Teams video conferencing application) on existing staff devices.  
195 NROL group facilitators and the NROL technology support staff member require webcam and

196 microphone-enabled devices and a stable (preferably wired) internet connection to deliver  
197 NROL groups. A headset can assist clear communication. For physical groups, a large screen  
198 television with a portable microphone is used for monitoring of patients whilst performing  
199 exercises. Session content is developed by group facilitators and based on evidence-based  
200 practice guidelines, and may include discussions, demonstrations, and shared presentations  
201 (MS Powerpoint). Group facilitators and the NROL technology support staff member use the  
202 NROL database during sessions for accessing patient details, timetabling information and for  
203 recording attendance. Access to a telephone is required in case of adverse events. Group  
204 facilitators are required to ensure clinical notes are entered for all patients in attendance at  
205 sessions. Weekly NROL staff meetings are held to update and discuss NROL delivery and group  
206 facilitators meet separately as required.

207 Patients require internet connectivity, and a webcam and microphone enabled device  
208 appropriate to their groups (e.g., patients in physical groups require a large screen device),  
209 with MS teams installed. Patients participating in physical groups require equipment for  
210 enabling stability when performing exercises, such as a chair, frame or table. Specific  
211 equipment may be requested for functional task practice and patients are advised to wear  
212 comfortable footwear and clothing and have access to water or a suitable drink. Patients  
213 participating in talking groups are advised to have a pen and paper for making notes or  
214 practicing cognitive exercises. All patients should have a telephone in case of technology  
215 issues or adverse events and should wear their pendant alarm if they have one.

216 **NROL exit materials and procedures**

217 On programme completion, patients receive a 'NROL exit email' with summary information  
218 and resources, which is also sent to the referrer. NROL outcome measures are repeated, and  
219 patients also complete a patient satisfaction survey.

## 220 **Evaluation**

221 Evaluation occurs alongside NROL delivery and includes analysis of service and patient level  
222 information. Data (quantitative and qualitative) are sourced from the NROL database, and  
223 outcome measures, and patient satisfaction surveys responses, and relevant analysis is  
224 undertaken by the NROL leads. Data is summarised and feedback at multiple clinical levels  
225 (delivery, organisational, regional) and to academic audiences.

## 226 **Staff training**

227 Meetings are held to discuss NROL evaluation findings. Shared learning sessions are run to  
228 optimise learnings across groups. General NROL information is shared with staff across trusts  
229 by NROL staff, including NROL leads and nominated NROL champions, during team and  
230 service meetings, and via emails and posts on the NROL hub.

231 New staff are introduced to NROL during orientation. Staff can observe NROL sessions for  
232 experiential learning, particularly when training to become a group facilitator. Staff training  
233 and guidance is available as required and provided remotely by NROL leadership, support or  
234 NROL therapy staff depending on training need. This includes training from technology  
235 support and a 'NROL staff technology guide' to upskill staff and improve confidence.

236

## 237 ***Item 5: Who provided***

238 NROL is provided by therapy staff from stroke and neurorehabilitation teams at partnered  
239 NHS Trusts. This is supported by a wider NROL team encompassed within a clinical-academic  
240 partnership. NROL uses an existing NHS workforce alongside dedicated NROL roles for the  
241 operational and administrative oversight, and technology support.

## 242 **Leadership**

243 NROL leadership is managed through a clinical-academic partnership team consisting of  
244 senior NHS Trust management staff, academic project staff, and a dedicated NROL  
245 operational lead.

## 246 **NROL therapy staff**

247 NROL delivery is provided by NROL therapy staff comprised of existing NHS therapists, therapy  
248 assistants and students. NROL therapy staff represent physiotherapy, occupational therapy,  
249 speech and language therapy and psychology disciplines at a range of seniority. Online groups  
250 are staffed by a minimum of two group facilitators (therapists and/or therapy assistants).

## 251 **Support staff**

252 NROL delivery is facilitated by support staff. A dedicated NROL technology support staff  
253 member provides technology assistance to patients and therapy staff. A NROL administrator  
254 assists with processing referrals and patient correspondence.

## 255 **Volunteers**

256 Volunteers are previous NROL patients or members of the stroke and neurorehabilitation  
257 community who support the running of community groups under guidance from the NROL  
258 therapy team.

259

260 ***Item 6: How (mode of delivery)***

261 Mode of delivery overlaps with the materials and procedures (see items 3 and 4). In brief,  
262 NROL is a service delivery model providing group-based rehabilitation as an adjunct to in-  
263 person therapy. Sessions and meetings are conducted remotely (MS Teams). NROL is  
264 embedded within an existing healthcare system (NHS) and makes use of existing  
265 infrastructure (IT hardware and software).

266

267 ***Item 7: Where***

268 For NROL delivery, group facilitators and the NROL technology support staff member attend  
269 group sessions from a private, well-lit, quiet workspace. This involves real-time online co-  
270 delivery from facilitators based at different geographical locations and NHS trusts. A room  
271 with adequate space is required for demonstrating exercises in physical groups. Patients take  
272 part in NROL groups from their own home (or suitable alternative) and also require a quiet,  
273 well-lit, private room that is appropriate to the needs of the group.

274

275 ***Item 8: When and how much***

276 NROL delivery is structured into recurring 6-week 'NROL' blocks. Blocks facilitate integration  
277 of NROL into the existing service as they account for the need for patient flow.

278 NROL groups run during the working week (Monday to Friday). A NROL introductory group  
279 (Meet and Greet) runs at the start of each block. All further group sessions are scheduled for  
280 60 minutes, with most groups run weekly. The NROL timetable is modified over time



281 according to patient need and staffing capacity. Sessions can be rescheduled due to  
282 unforeseen circumstances or bank holidays.

283 The maximum number of patients within a group is determined by the group facilitators and  
284 decided pragmatically to ensure the best experience for patients and staff (see NROL staff  
285 manual for more detail). In the event of too few or too many referrals for a group, deferral  
286 to the next block or the running additional groups are considered.

287

### 288 ***Item 9: Tailoring***

289 Tailoring is required at patient, group and block levels.

290 There is flexibility regarding when NROL is integrated within a patient's rehabilitation, and at  
291 present optimal timing is unknown. Patients joining NROL are referred to appropriate  
292 targeted therapy groups and a personalised programme created. Clinical reasoning should  
293 determine how NROL fits with a patient's in-person overall rehabilitation package of care.  
294 Patients can attend more than one NROL block if clinically indicated and the patients remains  
295 under the active care of their stroke or neurorehabilitation team.

296 The needs of patients in groups will be nuanced over time requiring a responsive approach.

297 All referrals are screened by group facilitators to ensure session content is tailored for the  
298 current needs. NROL delivery should be considerate that language used is appropriate for  
299 patients with a variety of neurological diagnoses (sudden, intermittent and progressive  
300 conditions) and chronicities.

301 The structure of blocks, in terms of groups offered and frequency, actively considers  
302 workforce availability. The groups provided in each block is a balance between patient



303 demand and staff capacity. Some groups run all blocks, whilst others run intermittently. There  
304 is an attempt to minimise groups running over holiday periods. Resourceful use of available  
305 workforce is encouraged and the remote nature of NROL enables staff to deliver NROL whilst  
306 working when from home or requiring work adjustments. Student involvement can be  
307 incorporated to support groups.

308

309 ***Item 10: Modifications***

310 This article describes the NROL innovation developed for regional use. It was modified from  
311 a standalone version (20) and expanded from a project implemented at a single NHS trust  
312 (14). The core components retained include provision of online real-time neurorehabilitation  
313 with technology assistance, incorporating multidisciplinary targeted therapy and community  
314 groups whilst embodying peer support. Adaptations for integration within an existing  
315 healthcare system included inclusion of stroke and other neurological conditions with varying  
316 chronicity, delivering as an adjunct to complement existing rehabilitation, use of existing  
317 workforce and being run as recurring 6-week NROL blocks to manage patient flow.

318 NROL continues to be modified over time. New groups are created to meet patient need or  
319 to capitalise on changing staff skill sets. Groups can also be deferred, discontinued or replaced  
320 based on patient and staff feedback.

321

322 ***Item 11: How well planned & Item 12: How well delivered (including fidelity)***

323 Communication, resources and technology assistance are provided to optimise NROL entry  
324 and participation (See *Items 3 & 4*). Service data are obtained and reviewed to monitor  
325 performance.

326 A detailed mixed-methods evaluation of NROL within a single trust is available (*Ackerley et al*  
327 *23*). Implementation and evaluation of the regional NROL programme in the North-West of  
328 England is ongoing. This multi-trust regional innovation has to date delivered 4 x 6-week NROL  
329 blocks, with 1082 patient contacts over 172 sessions provided to the 126 patients referred to  
330 NROL. Withdrawal prior to programme start (17%) and drop-out are reasonably low (15%).  
331 The median number of patients participating in a NROL block is 32 (range = 29-36). Ten  
332 different groups are currently offered across a range of therapies, with typically nine groups  
333 running per block. Therapy staffing efficiencies (ratio 0.4) are demonstrated compared to  
334 one-to-one delivery (ratio 1.0) and currently over 40 staff across the North-West are involved  
335 with group delivery. Overall NROL patient attendance is good (70%), with mechanisms in  
336 place to facilitate attendance (e.g., patients receive text/email prompts in the first two weeks  
337 of their programme). Attendance to the weekly peer support group (Café NROL) is optional  
338 however this opportunity is taken up by many patients (58%). Patient NROL outcome measure  
339 evaluation indicates improvements for many patients in health-related quality of life and  
340 activity performance over the time of their NROL programme, acknowledging that NROL is  
341 only one part of their overall rehabilitation. Overall patient satisfaction is high, with 99% of  
342 patients reporting they would recommend NROL to another person.

343

344 **Context**

345 The NROL innovation detailed in this article is delivered within a context that can be described  
346 using the domains of inner and outer settings (25).

347 The inner setting is defined as the four NHS Trusts that are situated within the Lancashire and  
348 South Cumbria Integrated Stroke and Neurorehabilitation Delivery Network that provide  
349 community-based stroke and neurorehabilitation care for the region. The region has a  
350 population of 1.8 million and covers a large geographical footprint with urban and rural  
351 settlements, and ethnic diversity. Deprivation and poor health affect many, with differences  
352 in life expectancy and quality of life varying significantly (40). In some neighbourhoods,  
353 healthy life expectancy is 46.5 years.

354 Aligning with national strategies and policies, the Lancashire and South Cumbria region has a  
355 vision to work collaboratively to share skills and expertise, data and best practice across Trusts  
356 (41). A challenge is that Trusts have varied service remits (stroke, neurological or both) and  
357 infrastructure (e.g. physical, staffing levels, technology systems, governance processes).

358 With regards to the outer setting, the impetus for starting NROL was the global pandemic,  
359 which also influenced sociocultural values of staff and patients to increase the worthiness and  
360 openness to use of remote technology. NROL also aligned with wider policy and strategies  
361 (42-44), benefitted from an already established clinical-academic partnership between the  
362 NHS and a university, and had funding from an external entity (45).

363

364

365

366 **Discussion**

367 NROL utilises an online delivery platform, with dedicated technology assistance, to provide  
368 multidisciplinary real-time group therapy to patients actively receiving community stroke and  
369 neurorehabilitation. Telerehabilitation is recognised as having a vital role to play in future  
370 healthcare delivery (46) but as yet there are limited details of how to do this (47). To address  
371 this need, the TIDieR checklist is used as a structured method to provide a comprehensive  
372 description of a regional NROL innovation embedded within a healthcare system. The actual  
373 process of completing the TIDieR was time intensive but did provide the impetus for the team  
374 to clearly describe NROL, agreeing the core components. Consideration was given to the  
375 necessary balance of information to ensure comprehensive detail but attempting not to  
376 overwhelm. Further documentation is available as supplementary files and by contacting the  
377 corresponding author. This description details an exemplar of telerehabilitation using NROL  
378 delivered in one region, and it is acknowledged that NROL will likely need adapting for other  
379 areas given the significant interaction between an innovation and its context. This article  
380 should facilitate other healthcare settings to adapt and implement NROL for their context.

381

382 Optimal adaptation of an innovation requires an understanding of the core components that  
383 cannot be changed versus the adaptable periphery that can be changed (48, 49). The core  
384 components of NROL include provision of online real-time neurorehabilitation with  
385 technology assistance, incorporating multidisciplinary targeted therapy and community  
386 groups whilst embodying peer support. It is proposed that these core components should be  
387 consistently implemented for NROL but that the processes to achieve them are adapted to fit  
388 local conditions. Examples include the use of MS Teams to deliver groups but other online  
389 platforms are available; use of recurring 6-week NROL blocks but other timings may suit other

390 services; the number and types of targeted therapy groups will need to reflect workforce  
391 capability and capacity. It is known innovations that have adaptability are more likely to be  
392 used in clinical practice (50, 51). Further examination of the adaptive components of NROL  
393 will help discern how it can be upscaled for use in a variety of contexts.

394  
395 Context is everything (52). A limitation of the TIDieR checklist is that it does not include an  
396 item on context. Arguably to understand the innovation fully and guide future adaptations  
397 an understanding of the context is required. This is because innovations are inextricably linked  
398 to the context in which they are delivered, and achieving a good fit between these is  
399 important to ensure the innovation works as intended (53). In this article, context is  
400 deliberately reported to help situate the innovation. NROL did take resources, time and  
401 effort to implement as a regional initiative and details on the implementation will be reported  
402 elsewhere. The need for resources to enable implementation is not unexpected (49, 54, 55)  
403 and current healthcare systems are often not set-up to facilitate this upfront effort. Influential  
404 contextual factors included leadership buy-in and commitment, a clinical-academic  
405 partnership and fit with the local and broader strategic landscape.

406  
407 Inevitably NROL will continue to evolve. The TIDieR checklist does allow for reporting on  
408 modifications. To date, the checklist has been primarily used for reporting interventions in  
409 trials (56, 57) and there are limited examples of its use for adapted interventions over time.  
410 This article documents current NROL delivery and captures its retrospective modifications.  
411 Going forward, transparent reporting of new iterations of NROL together with descriptions of  
412 their context should be undertaken to aid comparisons.

413

414 **Conclusion**

415 A hybrid approach incorporating telerehabilitation, to complement in-person therapy, is  
416 required for a future-proof service that follows policy and guidelines. This comprehensive  
417 description of a regional NROL innovation gives an example of successful implementation  
418 within an existing healthcare system. It provides a platform for others to reduce duplication  
419 of effort and help facilitate the use of telerehabilitation in clinical practice. Adapted versions  
420 of NROL are expected when implementing in different contexts. Transparent reporting and  
421 continuous evaluation alongside NROL implementation are encouraged and will ensure  
422 maximal impact for neurorehabilitation delivery.

423

424

425 Availability of data/ resources

426 Digital copies of NROL materials are available on request by contacting Professor Louise  
427 Connell ([laconnell@uclan.ac.uk](mailto:laconnell@uclan.ac.uk)).

428

429 *Competing interests:*

430 The authors declare that they have no competing interests.

431

432 *Funding:*

433 NROL was supported by a generous donation from the charity SameYou (Charity number 1170102).

434 The funders had no role in the design of the study and collection, analysis, and interpretation of data

435 or in writing the manuscript.

436

437

DRAFT

## 438 References

- 439 1. Lohse KR, Lang CE, Boyd LA. Is more better? Using metadata to explore dose-response  
440 relationships in stroke rehabilitation. *Stroke*. 2014;45(7):2053-8.
- 441 2. French B, Thomas LH, Leathley MJ, Sutton CJ, McAdam J, Forster A, et al. Repetitive Task  
442 Training for Improving Functional Ability After Stroke. *Stroke*. 2009;40(4):e98-e9.
- 443 3. Schneider EJ, Lannin NA, Ada L, Schmidt J. Increasing the amount of usual rehabilitation  
444 improves activity after stroke: a systematic review. *Journal of Physiotherapy*. 2016;62(4):182-7.
- 445 4. Kwakkel G, Van Peppen R, Wagenaar RC, Wood Dauphinee S, Richards C, Ashburn A, et al.  
446 Effects of Augmented Exercise Therapy Time After Stroke. *Stroke*. 2004;35(11):2529-39.
- 447 5. Sentinel Stroke National Audit Programme. The Road to Recovery. The Ninth SSNAP Annual  
448 Report 2022 [Available from:  
449 [https://www.strokeaudit.org/Documents/National/Clinical/Apr2021Mar2022/Apr2021Mar2022-](https://www.strokeaudit.org/Documents/National/Clinical/Apr2021Mar2022/Apr2021Mar2022-AnnualReport.aspx)  
450 [AnnualReport.aspx](https://www.strokeaudit.org/Documents/National/Clinical/Apr2021Mar2022/Apr2021Mar2022-AnnualReport.aspx).
- 451 6. Cramer SC, Dodakian L, Le V, McKenzie A, See J, Augsburg R, et al. A Feasibility Study of  
452 Expanded Home-Based Telerehabilitation After Stroke. *Front Neurol*. 2020;11:611453.
- 453 7. Laver KE, Adey-Wakeling Z, Crotty M, Lannin NA, George S, Sherrington C. Telerehabilitation  
454 services for stroke. *Cochrane Database Syst Rev*. 2020;1(1):Cd010255.
- 455 8. Stroke Association. A New Era for Stroke2016. Available from:  
456 [https://www.stroke.org.uk/sites/default/files/anefts\\_report\\_web.pdf](https://www.stroke.org.uk/sites/default/files/anefts_report_web.pdf).
- 457 9. Parrott D, Ibarra S. Randomized Controlled Trial Comparing a Telemedicine Brain Injury  
458 Coping Skills (BICS) group intervention to traditional in-person BICS for Brain Injury Patients and  
459 Caregivers. *Archives of Physical Medicine and Rehabilitation*. 2021;102(10):e15.
- 460 10. Khan F, Amatya B, Kesselring J, Galea M. Telerehabilitation for persons with multiple  
461 sclerosis. *Cochrane Database Syst Rev*. 2015(4):CD010508.
- 462 11. Rietdijk R, Power E, Attard M, Togher L. Acceptability of telehealth-delivered rehabilitation:  
463 Experiences and perspectives of people with traumatic brain injury and their carers. *Journal of*  
464 *Telemedicine and Telecare*. 2022;28(2):122-34.
- 465 12. Hargreaves DL, D. Stroke, GIRFT Programme National Specialty Report2022. Available from:  
466 <https://gmnisdn.org.uk/wp-content/uploads/2022/04/Stroke-GiRFT-report-Apr-22.pdf>)
- 467 13. Chartered Society of Physiotherapy. National Evaluation of Remote Physiotherapy Services:  
468 the findings 2022 [Available from: [https://www.csp.org.uk/professional-clinical/professional-](https://www.csp.org.uk/professional-clinical/professional-guidance/remote-consultations/national-evaluation-remote-0)  
469 [guidance/remote-consultations/national-evaluation-remote-0](https://www.csp.org.uk/professional-clinical/professional-guidance/remote-consultations/national-evaluation-remote-0).
- 470 14. Ackerley S, Wilson N, Boland P, Reed J, Connell L. Implementation of neurological group-  
471 based telerehabilitation within existing healthcare: a mixed methods evaluation. *BMC Health*  
472 *Services Research journal*. Under review.
- 473 15. Prvu Bettger J, Resnik LJ. Telerehabilitation in the Age of COVID-19: An Opportunity for  
474 Learning Health System Research. *Phys Ther*. 2020;100(11):1913-6.
- 475 16. Wosik J, Fudim M, Cameron B, Gellad ZF, Cho A, Phinney D, et al. Telehealth transformation:  
476 COVID-19 and the rise of virtual care. *Journal of the American Medical Informatics Association*.  
477 2020;27(6):957-62.
- 478 17. Taylor A, Caffery L, Gesesew H, King A, Bassal A-r, Ford K, et al. How Australian Health Care  
479 Services Adapted to Telehealth During the COVID-19 Pandemic: A Survey of Telehealth Professionals.  
480 *Frontiers in Public Health*. 2021;9.
- 481 18. Ross MH, Nelson M, Parravicini V, Weight M, Tyrrell R, Hartley N, et al. Staff perspectives on  
482 the key elements to successful rapid uptake of telerehabilitation in medium-sized public hospital  
483 physiotherapy departments. *Physiotherapy Research International*. 2022.
- 484 19. Yang CL, Waterson S, Eng JJ. Implementation and Evaluation of the Virtual Graded Repetitive  
485 Arm Supplementary Program (GRASP) for Individuals With Stroke During the COVID-19 Pandemic  
486 and Beyond. *Phys Ther*. 2021;101(6).



- 487 20. Beare B, Doogan CE, Douglass-Kirk P, Leff AP, Ward N. Neuro-Rehabilitation OnLine (N-ROL):  
488 description and evaluation of a group-based telerehabilitation programme for acquired brain injury.  
489 Journal of Neurology, Neurosurgery and Psychiatry. 2021;92(12):1354.
- 490 21. Buckingham S, Anil K, Demain S, Gunn H, Jones RB, Kent B, et al. Telerehabilitation for  
491 people with physical disabilities and movement impairment: development and evaluation of an  
492 online toolkit for practitioners and patients. Disability and Rehabilitation. 2022:1-8.
- 493 22. Royal College of Physicians. National Clinical Guideline for Stroke for the United Kingdom  
494 and Ireland.2022. Available from: [https://uploads-  
495 ssl.webflow.com/62c3d8070eda8516a8ba9475/6380a7e6a9a3db745a8e8315\\_2023%20National%20  
496 Oclinical%20Guideline%20for%20Stroke%20consultation%20document.pdf](https://uploads-ssl.webflow.com/62c3d8070eda8516a8ba9475/6380a7e6a9a3db745a8e8315_2023%20National%20Clinical%20Guideline%20for%20Stroke%20consultation%20document.pdf).
- 497 23. Hoffmann TC, Glasziou PP, Boutron I, Milne R, Perera R, Moher D, et al. Better reporting of  
498 interventions: template for intervention description and replication (TIDieR) checklist and guide.  
499 BMJ. 2014;348(mar07 3):g1687-g.
- 500 24. Rhon DI, Fritz JM, Kerns RD, McGeary DD, Coleman BC, Farrokhi S, et al. TIDieR-telehealth:  
501 precision in reporting of telehealth interventions used in clinical trials - unique considerations for the  
502 Template for the Intervention Description and Replication (TIDieR) checklist. BMC Medical Research  
503 Methodology. 2022;22(1).
- 504 25. Damschroder LJ, Reardon CM, Widerquist MAO, Lowery J. The updated Consolidated  
505 Framework for Implementation Research based on user feedback. Implementation Science.  
506 2022;17(1).
- 507 26. Mace RA, Mattos MK, Vranceanu A-M. Older adults can use technology: why healthcare  
508 professionals must overcome ageism in digital health. Translational Behavioral Medicine.  
509 2022;12(12):1102-5.
- 510 27. Tsai H-YS, Shillair R, Cotten SR. Social Support and "Playing Around". Journal of Applied  
511 Gerontology. 2017;36(1):29-55.
- 512 28. Doorley JD, Mace RA, Popok PJ, Grunberg VA, Ragnhildstveit A, Vranceanu AM. Feasibility  
513 Randomized Controlled Trial of a Mind-Body Activity Program for Older Adults With Chronic Pain and  
514 Cognitive Decline: The Virtual "Active Brains" Study. Gerontologist. 2022;62(7):1082-94.
- 515 29. Miller MJ, Pak SS, Keller DR, Barnes DE. Evaluation of Pragmatic Telehealth Physical Therapy  
516 Implementation During the COVID-19 Pandemic. Phys Ther. 2021;101(1).
- 517 30. Aterman S, Ghahari S, Kessler D. Characteristics of peer-based interventions for individuals  
518 with neurological conditions: a scoping review. Disability and Rehabilitation. 2022:1-32.
- 519 31. Hughes R, Fleming P, Henshall L. Peer support groups after acquired brain injury: a  
520 systematic review. Brain Injury. 2020;34(7):847-56.
- 521 32. Clark E, Maccrosain A, Ward NS, Jones F. The key features and role of peer support within  
522 group self-management interventions for stroke? A systematic review. Disability and Rehabilitation.  
523 2020;42(3):307-16.
- 524 33. Fleming V, Brownsett S, Krason A, Maegli MA, Coley-Fisher H, Ong Y-H, et al. Efficacy of  
525 spoken word comprehension therapy in patients with chronic aphasia: a cross-over randomised  
526 controlled trial with structural imaging. Journal of Neurology, Neurosurgery & Psychiatry.  
527 2021;92(4):418-24.
- 528 34. Ward NS, Brander F, Kelly K. Intensive upper limb neurorehabilitation in chronic stroke:  
529 outcomes from the Queen Square programme. Journal of Neurology, Neurosurgery & Psychiatry.  
530 2019;90(5):498-506.
- 531 35. NHS England. National Stroke Service Model: Integrated Stroke Delivery Networks2021.  
532 Available from: [https://www.england.nhs.uk/wp-content/uploads/2021/05/stroke-service-model-  
533 may-2021.pdf](https://www.england.nhs.uk/wp-content/uploads/2021/05/stroke-service-model-may-2021.pdf).
- 534 36. Stroke Association. Shaping stroke research to rebuild lives2021. Available from:  
535 [https://www.stroke.org.uk/sites/default/files/research/stroke\\_priority\\_setting\\_partnership\\_full\\_rep  
536 ort.pdf](https://www.stroke.org.uk/sites/default/files/research/stroke_priority_setting_partnership_full_report.pdf).

- 537 37. EuroQol Research Foundation. EQ-5D-3L User Guide 2018 [Available from:  
538 <https://euroqol.org/publications/user-guides>.  
539 38. Riazi A, Aspden T, Jones F. Stroke Self-efficacy Questionnaire: a Rasch-refined measure of  
540 confidence post stroke. *J Rehabil Med*. 2014;46(5):406-12.  
541 39. Stratford P, Gill C, Westaway M, Binkley J. Assessing Disability and Change on Individual  
542 Patients: A Report of a Patient Specific Measure. *Physiotherapy Canada*. 1995;47(4):258-63.  
543 40. Lancashire Independent Economic Review. Deep Dive: Health, Wealth & Wellbeing 2021.  
544 Available from: [https://www.lancashireier.org/wp-](https://www.lancashireier.org/wp-content/uploads/2021/12/LIER_Health_Wealth_and_Wellbeing_2021_v1.pdf)  
545 [content/uploads/2021/12/LIER Health Wealth and Wellbeing 2021 v1.pdf](https://www.lancashireier.org/wp-content/uploads/2021/12/LIER_Health_Wealth_and_Wellbeing_2021_v1.pdf).  
546 41. Lancashire and South Cumbria Provider Collaborative. Our vision 2022 [16 February 2023].  
547 Available from: <https://lscprovidercollaborative.nhs.uk/about-us/our-vision>  
548 42. World Health A. Digital health. Geneva: World Health Organization; 2018.  
549 43. World Health Assembly. eHealth. Geneva: World Health Organization; 2005.  
550 44. NHS England and NHS Improvement. 2022/23 priorities and operational planning  
551 guidance2022. Available from: [https://www.england.nhs.uk/wp-](https://www.england.nhs.uk/wp-content/uploads/2022/02/20211223-B1160-2022-23-priorities-and-operational-planning-guidance-v3.2.pdf)  
552 [content/uploads/2022/02/20211223-B1160-2022-23-priorities-and-operational-planning-guidance-](https://www.england.nhs.uk/wp-content/uploads/2022/02/20211223-B1160-2022-23-priorities-and-operational-planning-guidance-v3.2.pdf)  
553 [v3.2.pdf](https://www.england.nhs.uk/wp-content/uploads/2022/02/20211223-B1160-2022-23-priorities-and-operational-planning-guidance-v3.2.pdf)  
554 45. SameYou. NROL 2022 [16 February 2023]. Available from: <https://www.sameyou.org/nrol>.  
555 46. NHS Health Education England. The Topol Review 2023 [16 February 2023]. Available from:  
556 <https://topol.hee.nhs.uk/the-topol-review/>  
557 47. English C, Ceravolo MG, Dorsch S, Drummond A, Gandhi DB, Halliday Green J, et al.  
558 Telehealth for rehabilitation and recovery after stroke: State of the evidence and future directions.  
559 *International Journal of Stroke*. 2022;17(5):487-93.  
560 48. Haynes A, Brennan S, Redman S, Williamson A, Gallego G, Butow P. Figuring out fidelity: a  
561 worked example of the methods used to identify, critique and revise the essential elements of a  
562 contextualised intervention in health policy agencies. *Implementation Science*. 2015;11(1).  
563 49. Greenhalgh T, Papoutsi C. Spreading and scaling up innovation and improvement. *BMJ*.  
564 2019;l2068.  
565 50. Rogers E. Diffusion of innovations: 5th Edition. New York: Free Press; 2003.  
566 51. Gustafson DH, Sainfort F, Eichler M, Adams L, Bisognano M, Steudel H. Developing and  
567 Testing a Model to Predict Outcomes of Organizational Change. *Health Services Research*.  
568 2003;38(2):751-76.  
569 52. Bate P. The Health Foundation: Perspectives on context. Available from:  
570 <https://www.health.org.uk/sites/default/files/PerspectivesOnContextBateContextIsEverything.pdf>.  
571 53. Hawe P. Lessons from Complex Interventions to Improve Health. *Annual Review of Public*  
572 *Health*. 2015;36(1):307-23.  
573 54. Standing C, Standing S, McDermott M-L, Gururajan R, Kiani Mavi R. The Paradoxes of  
574 Telehealth: a Review of the Literature 2000-2015. *Systems Research and Behavioral Science*.  
575 2018;35(1):90-101.  
576 55. Signal N, Martin T, Leys A, Maloney R, Bright F. Implementation of telerehabilitation in  
577 response to COVID-19: Lessons learnt from neurorehabilitation clinical practice and education. *New*  
578 *Zealand Journal of Physiotherapy*. 2020;48:117-26.  
579 56. Tume LN, Blackwood B, McAuley DF, Morris K, Peters MJ, Jordan J, et al. Using the TIDieR  
580 checklist to describe the intervention of the Sedation and Weaning in Children( SANDWICH) trial.  
581 *Nursing in Critical Care*. 2022.  
582 57. Carlsson H, Rosén B, Björkman A, Pessah-Rasmussen H, Brogårdh C. SENSory re-learning of  
583 the UPPEr limb (SENSUPP) after stroke: development and description of a novel intervention using  
584 the TIDieR checklist. *Trials*. 2021;22(1).

585
