1 **Title**

2 NeuroRehabilitation OnLine (NROL): Description of a multidisciplinary group  
3 telerehabilitation innovation for stroke and neurological conditions using the TIDieR  
4 checklist

5 **Authors**

6 Suzanne Ackerley<sup>1,2</sup> ([sackerley@uclan.ac.uk](mailto:sackerley@uclan.ac.uk)), Neil Wilson<sup>1</sup> ([nwilson9@uclan.ac.uk](mailto:nwilson9@uclan.ac.uk)), Paul  
7 Boland<sup>1</sup> ([pboland2@uclan.ac.uk](mailto:pboland2@uclan.ac.uk)), Rosemary Peel<sup>3</sup> ([rosemary.peel@mbht.nhs.uk](mailto:rosemary.peel@mbht.nhs.uk)), Louise  
8 Connell<sup>1,2</sup> ([laconnell@uclan.ac.uk](mailto:laconnell@uclan.ac.uk))

9 <sup>1</sup>University of Central Lancashire, Preston, Lancashire, UK

10 <sup>2</sup> East Lancashire Hospitals NHS Trust, Burnley, Lancashire, UK

11 <sup>3</sup> University Hospitals of Morecambe Bay NHS Foundation Trust

12 **Corresponding author**

13 Louise Connell, School of Sport and Health Sciences, University of Central Lancashire, UK.

14 Email: [laconnell@uclan.ac.uk](mailto:laconnell@uclan.ac.uk)

15

16 **ABSTRACT**

17 **Background**

18 Providing recommended amounts of rehabilitation for stroke and neurological patients is  
19 challenging. Telerehabilitation is viable for delivering rehabilitation and an acceptable  
20 adjunct to in-person therapy. NeuroRehabilitation OnLine (NROL) was developed as a pilot  
21 and subsequently operationalised as a regional innovation embedded across four National  
22 Health Service (NHS) Trusts.

23 **Objective**

24 To describe the NROL innovation to assist future implementation and replication efforts.

25 **Methods**

26 The Template for Intervention Description and Replication (TIDieR) checklist, with guidance  
27 from the TIDieR-Telehealth extension, was used to describe NROL. The description was  
28 developed collaboratively by clinical-academics, therapists, managers, and researchers.  
29 Updated Consolidated Framework for Implementation Research domains were used to  
30 describe the context in which the innovation was delivered.

31 **Results**

32 NROL delivers online group-based real-time neurorehabilitation with technology assistance.  
33 It incorporates multidisciplinary targeted therapy and peer support to complement existing  
34 therapy. Procedures, materials and structure are detailed to demonstrate how NROL is  
35 embedded within a healthcare system. NROL uses existing NHS therapy workforce alongside

36 dedicated NROL roles, including an essential technology support role. Selection of NROL  
37 groups is dependent on patient need. The NROL innovation is tailored over time in response  
38 to feedback. NROL described here is situated within a regional stroke and  
39 neurorehabilitation network, aligns with local and national strategies, and capitalises on an  
40 existing clinical-academic partnership.

#### 41 **Conclusion**

42 This comprehensive description of a regional NROL innovation, and clarification of core  
43 components, should facilitate other healthcare settings to adapt and implement NROL for  
44 their context. Continuous evaluation alongside implementation will ensure maximal impact  
45 for neurorehabilitation.

46 **SUMMARY BOX**

- 47       • The NROL innovation has been successfully integrated at a regional level to  
48       complement in-person therapy and has been comprehensively described using the  
49       TIDieR checklist.
- 50       • The core components of NROL have been clarified (Figure 1), with materials,  
51       procedures and structure detailed providing a platform to assist future  
52       implementation and replication efforts.
- 53       • Adaptations of NROL are likely to be necessary when implementing in different  
54       healthcare contexts. New iterations of NROL together with descriptions of their  
55       context should be undertaken to aid comparisons.
- 56       • Continuous evaluation alongside NROL implementation is encouraged and will  
57       ensure maximal impact for healthcare delivery.
- 58       • The model of care developed for NROL delivery may have potential use in other  
59       areas of healthcare.

60

61 **Abstract word count:** 250

62 **Manuscript word count:** 2482 (excluding table)

63 Tables: 1

64 Figures: 1

## 65 BACKGROUND

66 Despite a wealth of evidence that greater amounts of rehabilitation can improve  
67 outcomes(1-3), stroke and neurological patients are consistently receiving suboptimal  
68 amounts of therapy(4). Increasing access and opportunity for therapy is a critical step to  
69 addressing shortfalls in therapy amount but needs to be feasible with limited workforce.  
70 Telerehabilitation, the provision of rehabilitation remotely via telecommunication devices,  
71 offers one solution to help mitigate this challenge. It can deliver conventional in-person  
72 therapies online with equivalent outcomes(5-8) and similar attendance levels and  
73 acceptability to patients(9-11). Patients and staff report advantages in terms of saving time,  
74 energy and travel(11-13). In the UK and Ireland, clinical guidelines for stroke rehabilitation  
75 recommend telerehabilitation alongside conventional in-person therapy(14).

76 A group-based real-time telerehabilitation innovation for patients with acquired brain injury  
77 was piloted in London, UK, entitled NROL (NeuroRehabilitation OnLine). This standalone  
78 version demonstrated positive impacts on patient-reported outcomes(15). NROL was  
79 subsequently adapted and operationalised within the UK National Health Service (NHS) at a  
80 single NHS Trust level yielding positive results(11). NROL was then expanded into a regional  
81 innovation involving four NHS Trusts aligning to the NHS new Integrated Care System  
82 structure to work collaboratively across regions. NROL is acknowledged as an exemplar  
83 innovation for delivering remote rehabilitation(14).

84 Despite the successful development of NROL, as yet it has only been described in its  
85 standalone version(15). This article describes the NROL innovation developed for regional  
86 use within an existing healthcare service, with the aim of assisting future implementation  
87 and replication efforts.

88

## 89 **METHODS**

90 This article describes NROL using the 12-items of the Template for Intervention Description  
91 and Replication (TIDieR) checklist(16) and incorporates guidance from the TIDieR-Telehealth  
92 extension(17). Checklist details were developed iteratively and collaboratively, with input  
93 from staff involved in NROL implementation and evaluation including clinical-academics,  
94 therapists, managers, researchers and a patient volunteer. Initially, individual TIDieR  
95 checklists describing each NROL group in a high level of detail were produced. These  
96 informed development of NROL staff manual and standard operating procedure documents.  
97 Finally, we abstracted from these documents to develop a superordinate TIDieR checklist,  
98 aimed at describing NROL as a model of care within an existing healthcare system for  
99 application at a regional level.

100 Given the extensive interplay between an innovation and context, the settings in which  
101 NROL was implemented are described according to domains of the updated Consolidated  
102 Framework for Implementation Research (CFIR)(18).

### 103 **Patient and public involvement**

104 NROL has been improved by partnership, with patients, carers and staff feedback shaping  
105 the intervention described. The NROL patient volunteer co-produced individual TIDieR  
106 checklists.

107

## 108 **RESULTS**

109 **Item 1: Intervention (innovation) name**

110 NeuroRehabilitation OnLine (NROL)

111

112 **Item 2: Why**

113 NROL aims to enhance the rehabilitation offer for adult patients actively receiving stroke

114 and neurorehabilitation. As part of a hybrid model of care, it utilises an online platform

115 offering advantages to save time, energy, and travel, enabling more therapy to be delivered

116 using existing workforce(11). Group therapy has favourable evidence(15), leveraging the

117 benefits of peer support(19). By embedding NROL within the existing NHS system, it

118 supports sustainable service delivery. NROL aligns with strategic priorities, such as the use of

119 data and digital technologies in healthcare(20). Collective use of the workforce, as a

120 provider collaborative, fosters a community of practice and shared learning(21) and also

121 allows for a critical mass of patients to receive group therapy where impairment incidence is

122 low.

123 **Item 3: What (materials) and Item 4: What (procedures)**

124 A secure 'NROL hub' collaboration platform (in Microsoft (MS) Teams) was created as a

125 repository for shared resources. Key documents include an 'NROL standard operating

126 procedure' and relevant approvals (e.g., Data Protection Impact Assessment). NROL

127 branding (i.e., logo) increases visibility and facilitates team cohesion.

128 The materials and procedures for NROL referral, entry, delivery and exit phases are detailed

129 below, and outlined in an NROL process chart within the supplementary file.

130 NROL referral materials and procedures

131 Therapy team members identify, consent and refer suitable patients to appropriate NROL  
132 groups. They submit an 'NROL referral form' via the NROL hub, guided by an 'NROL staff  
133 manual' (Supplementary file). An 'NROL patient information leaflet' is provided to patients.

134 NROL entry materials and procedures

135 NROL support staff process referrals and coordinate timetabling using an NROL database  
136 (MS Excel). Prior to programme start, an NROL staff member contacts new patients to  
137 complete 'NROL outcome measures'. Measures include the EQ-5D-5L for measuring health-  
138 related quality of life(22) and the Patient Specific Functional Scale (PSFS) for measuring  
139 activity performance(23). Additionally, an NROL technology support staff member ensures  
140 that each patient has the necessary technology capability and equipment (hardware,  
141 software (MS Teams and email) and connectivity) to access NROL. An 'NROL technology  
142 support guide' is provided. Patients participating in physical groups receive an 'NROL  
143 physical group guide' providing instructions on how to set up a safe exercise environment.  
144 Patients (and referrer) receive a personalised 'NROL entry email' that outlines their 6-week  
145 programme, and group invites.

146 NROL delivery materials and procedures

147 Patients join NROL groups according to their personalised programme. These include  
148 targeted talking (e.g., cognition, communication, fatigue, living well) and physical (e.g.,  
149 balance/mobility and upper limb) therapy groups incorporating interactive, educational, and  
150 practical elements. These groups are staffed by at least two group facilitators, often jointly



151 by more than one discipline. Community groups are offered to all patients and include an  
152 NROL introduction and an optional weekly peer support group. Throughout the programme  
153 and during each NROL session, technology assistance is available to both patients and staff.  
154 If a patient is expected to join a group but does not attend, the NROL technology support  
155 staff member makes contact to offer assistance.

156 NROL sessions are delivered by staff online (MS Teams) using existing devices equipped with  
157 webcams and microphones. For physical groups, a large screen television is used for  
158 monitoring patients during exercise. The session content is developed by group facilitators  
159 based on evidence-based practice and may include discussions, demonstrations, and  
160 presentations. The NROL database is used during sessions to access and record patient  
161 information, such as attendance. A telephone is required in case of adverse events. Group  
162 facilitators ensure that clinical notes are entered for all patients. Regular NROL staff  
163 meetings and group-specific meetings are held to discuss NROL delivery.

164 Patients participate in NROL using their agreed device. For patients in physical groups, a  
165 large screen device is necessary. Specific equipment, such as a frame or table, may be  
166 required to ensure stability. Patients are advised to wear comfortable footwear and clothing  
167 and have access to a suitable drink. Functional task practice may necessitate additional  
168 equipment e.g., pen and paper, kitchen items. Patients should have a telephone available in  
169 case of technology issues or adverse events. If patients have pendant alarms, they are  
170 encouraged to wear them.

171 NROL exit materials and procedures

172 Patients (and referrer) receive an 'NROL exit email' that provides summary information.

173 Outcome measures are repeated, and patients are asked to complete a satisfaction survey.

174 Evaluation

175 Evaluation occurs concurrently with NROL delivery. Service and patient level data are

176 sourced from the NROL database. The NROL leads undertake regular relevant analysis and

177 summarise the data for feedback for multiple clinical and audiences.

178 Staff training

179 NROL evaluation findings are discussed in meetings. General NROL information is

180 disseminated to staff across the participating trusts by NROL staff. Shared learning sessions

181 are run to optimise knowledge translation. New staff members are introduced to NROL

182 during their orientation. Staff can observe NROL sessions for experiential learning.

183

184 **Item 5: Who**

185 Details of who is involved in NROL service delivery are provided in Table 1. NROL uses an

186 existing NHS workforce alongside dedicated NROL roles for operations, administration,

187 assistance, and technology support.

188 **Table 1: Who is involved in NROL**

| Category     | Location                                                                          | Role                            |                         |
|--------------|-----------------------------------------------------------------------------------|---------------------------------|-------------------------|
| Patients     | Within stroke and neurorehabilitation services from participating regional Trusts | Active community-based patients |                         |
| Existing NHS | From stroke and                                                                   | NROL therapy staff,             | Occupational therapists |

|                                |                                                                                                                            |                                                           |                                                                                                                                    |
|--------------------------------|----------------------------------------------------------------------------------------------------------------------------|-----------------------------------------------------------|------------------------------------------------------------------------------------------------------------------------------------|
| workforce                      | neurorehabilitation services from participating regional Trusts                                                            | including nominated NROL champions and group facilitators | Physiotherapists<br>Speech and Language therapists<br>Psychologists<br>Therapy assistants<br>Allied health and psychology students |
|                                |                                                                                                                            | NROL support staff                                        | NROL technology support*<br>NROL administrator*<br>Trust administrators                                                            |
| Patient and public involvement |                                                                                                                            | Volunteers                                                | Ex-NROL patients<br>Members of the stroke and neurorehabilitation community                                                        |
| Leadership                     | From stroke and neurorehabilitation services from participating regional Trusts and regional higher education institutions | Clinical-academic partnership                             | Senior NHS Trust management<br>NROL operational lead*<br>Clinical-academic project staff                                           |

189 NROL NeuroRehabilitation OnLine; NHS National Health Service; \*Dedicated NROL role

190

191 **Item 6: How (mode of delivery)**

192 Mode of delivery overlaps with the material and procedures, see Items 3 and 4.

193

194 **Item 7: Where**

195 Group facilitators and the NROL technology support staff member attend from private, well-

196 lit, and quiet workspaces at different geographical locations and NHS trusts. A room with

197 adequate space is required for demonstrating exercises for physical groups. Patients

198 participate in NROL groups from their homes.

199

200 **Item 8: When and how much**

201 NROL delivery is structured into recurring 6-week 'NROL' blocks to facilitate patient flow. An  
202 NROL introductory group runs at the start of each block. All further group sessions are  
203 scheduled for 60 minutes, with most groups run weekly. The maximum number of patients  
204 within a group is determined by the group facilitators to ensure the best experience for  
205 patients and staff (see NROL staff manual).

206

### 207 **Item 9: Tailoring**

208 Tailoring is required at patient, group and block levels. Clinical reasoning should determine  
209 how NROL fits with a patient's overall rehabilitation. Patients can attend more than one  
210 NROL block if clinically indicated, providing they remain under the active care of their stroke  
211 or neurorehabilitation team. The needs of patients in groups will be nuanced over time  
212 requiring a responsive approach. All referrals are screened by group facilitators to ensure  
213 session content is tailored. The structure of blocks, in terms of groups offered and  
214 frequency, actively considers patient need, workforce availability, and capitalises on  
215 changing staff skill sets. Resourceful use of available workforce is encouraged, such as  
216 enabling staff to deliver NROL whilst working from home or by those requiring work  
217 adjustments and involving students. NROL materials are continually edited to reflect  
218 updates.

219

### 220 **Item 10: Modifications**

221 This article describes the NROL innovation modified for regional use. The core components  
222 retained from earlier iterations(11, 15) include provision of online real-time  
223 neurorehabilitation with technology assistance, incorporating multidisciplinary targeted

224 therapy and community groups whilst embodying peer support. Adaptations for integration  
225 within an existing healthcare system have led to additional core components including  
226 delivery as an adjunct to complement existing rehabilitation and use of existing workforce.  
227 Further modifications include running NROL as recurring 6-week blocks and inclusion of  
228 patients with stroke or other neurological conditions at varying chronicity.

229 ***Insert Figure 1 here***

230

231 **Item 11: How well planned & Item 12: How well delivered (including fidelity)**

232 Communications, resources and technology assistance are provided to optimise NROL entry  
233 and participation (see Items 3 & 4). Service data are obtained and reviewed to monitor  
234 performance.

235 A detailed mixed-methods evaluation of NROL within a single trust is available(11).

236 Implementation and evaluation of the regional NROL innovation is ongoing.

237

238 **Context**

239 The NROL innovation detailed in this article is delivered within a context that can be  
240 described using the domains of inner and outer settings(18).

241 The inner setting is defined as the four NHS Trusts that are situated within the Lancashire  
242 and South Cumbria Integrated Stroke and Neurorehabilitation Delivery Network that  
243 provide community-based stroke and neurorehabilitation care for the region. The region has  
244 a population of 1.8 million and covers a large geographical footprint with urban and rural

245 settlements, and ethnic diversity. Deprivation and poor health affect many, with differences  
246 in life expectancy and quality of life varying significantly, in some neighbourhoods, healthy  
247 life expectancy is 46.5 years(24).

248 Aligning with national strategies and policies, the Lancashire and South Cumbria region has  
249 a vision to work collaboratively across Trusts. A challenge is that Trusts have varied service  
250 remits (stroke, neurological or both) and infrastructure (e.g., physical, staffing levels,  
251 technology systems, governance processes).

252 With regards to the outer setting, the impetus for starting NROL was the global pandemic,  
253 which also influenced sociocultural values of staff and patients to increase the worthiness  
254 and openness to use of remote technology. NROL also aligned with wider policy and  
255 strategies(20), benefitted from an already established clinical-academic partnership  
256 between the NHS and a university, and had funding from external sources (SameYou, NHS  
257 England).

258

## 259 **DISCUSSION**

260 NROL utilises an online delivery platform, with dedicated technology assistance, to provide  
261 multidisciplinary real-time group therapy. Telerehabilitation is recognised as having a vital  
262 role to play in future healthcare delivery but as yet there are limited details of how to do  
263 this(25). To address this need, the TIDieR checklist is used to provide a comprehensive  
264 description of NROL. The actual process of completing the TIDieR was time intensive but did  
265 provide the impetus for the team to clearly describe the innovation, agreeing the core  
266 components. Consideration was given to the necessary balance of information to ensure

267 comprehensive detail but attempting not to overwhelm. Further documentation is available  
268 within the supplementary file and by contacting the corresponding author.

269 Optimal adaptation of an innovation requires an understanding of the core components  
270 that cannot be changed versus the adaptable periphery that can be changed(18, 26). It is  
271 proposed that the core components identified (Figure 1) should be consistently  
272 implemented for NROL but that the processes to achieve them are adapted to fit local  
273 conditions. Examples include the use of MS Teams to deliver groups but other online  
274 platforms are available; use of recurring 6-week NROL blocks but other timings may suit  
275 other services; the number and types of targeted therapy groups will need to reflect  
276 workforce capability and capacity. It is known innovations that have adaptability are more  
277 likely to be used in clinical practice(27). Ongoing examination of the adaptive components of  
278 NROL will help discern how it can be upscaled for use in a variety of contexts.

279 Context is everything(28). A limitation of the TIDieR checklist is that it does not include an  
280 item on context. Arguably to understand the innovation fully and guide future adaptations  
281 an understanding of the context is required. This is because innovations are inextricably  
282 linked to the context in which they are delivered, and achieving a good fit between these is  
283 important to ensure the innovation works as intended(29). In this article, context is  
284 deliberately reported to help situate the innovation. NROL did take resources, time and  
285 effort to implement as a regional initiative and details on the implementation will be  
286 reported elsewhere. The need for resources to enable implementation is not  
287 unexpected(13, 26) and current healthcare systems are often not set-up to facilitate this  
288 upfront effort. Influential contextual factors included leadership buy-in and commitment, a  
289 clinical-academic partnership and fit with the local and broader strategic landscape.

290 Inevitably NROL will continue to evolve. The TIDieR checklist does allow for reporting on  
291 modifications and tailoring. To date, the checklist has been primarily used for reporting  
292 interventions in trials(30) and there are limited examples of its use for adapted  
293 interventions over time. This article documents current NROL delivery and captures its  
294 retrospective modifications and tailoring. Going forward, transparent reporting of new  
295 iterations of NROL together with descriptions of their context should be undertaken to aid  
296 comparisons. The model of care developed for NROL delivery may have potential use in  
297 other areas of healthcare.

298

## 299 **CONCLUSION**

300 A hybrid approach incorporating telerehabilitation, to complement in-person therapy, is  
301 required for a future-proof service that follows policy and guidelines. This comprehensive  
302 description of a regional NROL innovation gives an example of successful implementation  
303 within an existing healthcare system. It provides a platform for others to reduce duplication  
304 of effort and help facilitate the use of telerehabilitation in clinical practice. Adapted versions  
305 of NROL are expected when implementing in different contexts. Transparent reporting and  
306 continuous evaluation alongside NROL implementation are encouraged and will ensure  
307 maximal impact for neurorehabilitation delivery.



308 **FIGURE LEGEND**

309 **Figure 1**

310 **NROL core components.** Six core components are identified for integration of NROL within  
311 an existing healthcare system. These components should be consistently implemented for  
312 NROL but the processes to achieve them should be adapted to fit local conditions.

313 **Availability of data/ resources**

314 Digital copies of NROL materials are available on request by contacting Professor Louise  
315 Connell ([laconnell@uclan.ac.uk](mailto:laconnell@uclan.ac.uk)).

316 **Funding**

317 This work was supported by a generous donation from the charity SameYou (Charity  
318 number 1170102) and NHS England Stroke Quality Improvement for Rehabilitation (SQulRe)  
319 Catalyst funding. The funders had no role in writing the manuscript.

320 **Competing interests**

321 The authors declare that they have no competing interests.

322 **Author contributions**

323 SA and LC conceived the study. All authors (SA, LC, NW, PB, RP) were involved in the  
324 planning and conduct of the work described in the paper. SA, LC and NW drafted the initial  
325 manuscript. All authors were involved in revising the manuscript. All authors have given final  
326 approval of the version to be published and agree to be accountable for all aspects of the  
327 work.

328 **Acknowledgements:**

329 We would like to express our gratitude to the individuals and services that contribute to  
330 NROL, and have contributed to this work, from East Lancashire Hospitals NHS Trust,  
331 University Hospitals of Morecambe Bay NHS Foundation Trust, Blackpool Teaching Hospitals

332 NHS Foundation Trust and Lancashire and South Cumbria NHS Foundation Trust. Special  
333 thanks go to Ian Grimshaw for providing technological support for patients and staff, as well  
334 as supporting administrative and organisational operations. We extend our appreciation to  
335 the UCL N-ROL team for sharing their expertise and experience of online delivery and  
336 valuable discussions. Many thanks to the SameYou team for their generous fundraising and  
337 support which have made NROL possible, and to NHS England for the SQuIRe Catalyst  
338 funding to support commissioning intentions.

## 339 REFERENCES

- 340 1. Lohse KR, Lang CE, Boyd LA. Is more better? Using metadata to explore dose-response  
341 relationships in stroke rehabilitation. *Stroke*. 2014;45(7):2053-8.10.1161/strokeaha.114.004695
- 342 2. Schneider EJ, Lannin NA, Ada L, et al. Increasing the amount of usual rehabilitation improves  
343 activity after stroke: a systematic review. *Journal of Physiotherapy*. 2016;62(4):182-  
344 [7.https://doi.org/10.1016/j.jphys.2016.08.006](https://doi.org/10.1016/j.jphys.2016.08.006)
- 345 3. French B, Thomas LH, Coupe J, et al. Repetitive task training for improving functional ability  
346 after stroke. *Cochrane Database Syst Rev*.  
347 2016;11(11):Cd006073.DOI:10.1002/14651858.CD006073.pub3
- 348 4. Sentinel Stroke National Audit Programme. The Road to Recovery. The Ninth SSNAP Annual  
349 Report. [Internet] 2022. Available from:  
350 [https://www.strokeaudit.org/Documents/National/Clinical/Apr2021Mar2022/Apr2021Mar2022-](https://www.strokeaudit.org/Documents/National/Clinical/Apr2021Mar2022/Apr2021Mar2022-AnnualReport.aspx)  
351 [AnnualReport.aspx](https://www.strokeaudit.org/Documents/National/Clinical/Apr2021Mar2022/Apr2021Mar2022-AnnualReport.aspx) [accessed 30 March 2023]
- 352 5. Cramer SC, Dodakian L, Le V, et al. A Feasibility Study of Expanded Home-Based  
353 Telerehabilitation After Stroke. *Front Neurol*. 2020;11:611453.10.3389/fneur.2020.611453
- 354 6. Laver K, Walker M, Ward N. Telerehabilitation for Stroke is Here to Stay. But at What Cost?  
355 *Neurorehabilitation and Neural Repair*. 2022;36(6):331-4.10.1177/15459683221100492
- 356 7. Parrott D, Ibarra S. Randomized Controlled Trial Comparing a Telemedicine Brain Injury  
357 Coping Skills (BICS) group intervention to traditional in-person BICS for Brain Injury Patients and  
358 Caregivers. *Archives of Physical Medicine and Rehabilitation*.  
359 2021;102(10):e15.<https://doi.org/10.1016/j.apmr.2021.07.434>
- 360 8. Khan F, Amatya B, Kesselring J, et al. Telerehabilitation for persons with multiple sclerosis.  
361 *Cochrane Database Syst Rev*. 2015(4):CD010508.10.1002/14651858.CD010508.pub2
- 362 9. Yang CL, Waterson S, Eng JJ. Implementation and Evaluation of the Virtual Graded Repetitive  
363 Arm Supplementary Program (GRASP) for Individuals With Stroke During the COVID-19 Pandemic  
364 and Beyond. *Phys Ther*. 2021;101(6).10.1093/ptj/pzab083
- 365 10. Rietdijk R, Power E, Attard M, et al. Acceptability of telehealth-delivered rehabilitation:  
366 Experiences and perspectives of people with traumatic brain injury and their carers. *Journal of*  
367 *Telemedicine and Telecare*. 2022;28(2):122-34.10.1177/1357633x20923824
- 368 11. Ackerley S, Wilson N, Boland P, et al. Implementation of neurological group-based  
369 telerehabilitation within existing healthcare during COVID-19: a mixed methods evaluation. *BMC*  
370 *Health Services Research journal*. 2023;23(1):671.
- 371 12. Buckingham S, Anil K, Demain S, et al. Telerehabilitation for people with physical disabilities  
372 and movement impairment: development and evaluation of an online toolkit for practitioners and  
373 patients. *Disabil Rehabil*. 2023;45(11):1885-92.10.1080/09638288.2022.2074549
- 374 13. Signal N, Martin T, Leys A, et al. Implementation of telerehabilitation in response to COVID-  
375 19: lessons learnt from neurorehabilitation clinical practice and education. *New Zealand Journal of*  
376 *Physiotherapy*. 2020;48(3):117-26.<http://dx.doi.org/10.15619/NZJP/48.3.03>
- 377 14. Royal College of Physicians. National Clinical Guideline for Stroke for the United Kingdom  
378 and Ireland. [Internet] 2022. Available from: [https://uploads-](https://uploads-ssl.webflow.com/62c3d8070eda8516a8ba9475/6380a7e6a9a3db745a8e8315_2023%20National%20Clinical%20Guideline%20for%20Stroke%20consultation%20document.pdf)  
379 [ssl.webflow.com/62c3d8070eda8516a8ba9475/6380a7e6a9a3db745a8e8315\\_2023%20National%20](https://uploads-ssl.webflow.com/62c3d8070eda8516a8ba9475/6380a7e6a9a3db745a8e8315_2023%20National%20Clinical%20Guideline%20for%20Stroke%20consultation%20document.pdf)  
380 [Clinical%20Guideline%20for%20Stroke%20consultation%20document.pdf](https://uploads-ssl.webflow.com/62c3d8070eda8516a8ba9475/6380a7e6a9a3db745a8e8315_2023%20National%20Clinical%20Guideline%20for%20Stroke%20consultation%20document.pdf) [accessed 30 March  
381 2023]
- 382 15. Beare B, Doogan CE, Douglass-Kirk P, et al. Neuro-Rehabilitation OnLine (N-ROL): description  
383 and evaluation of a group-based telerehabilitation programme for acquired brain injury. *Journal of*  
384 *Neurology, Neurosurgery and Psychiatry*. 2021;92(12):1354.10.1136/jnnp-2021-326809
- 385 16. Hoffmann TC, Glasziou PP, Boutron I, et al. Better reporting of interventions: template for  
386 intervention description and replication (TIDieR) checklist and guide. *BMJ*. 2014;348(mar07  
387 3):g1687-g.10.1136/bmj.g1687

- 388 17. Rhon DI, Fritz JM, Kerns RD, et al. TIDieR-telehealth: precision in reporting of telehealth  
389 interventions used in clinical trials - unique considerations for the Template for the Intervention  
390 Description and Replication (TIDieR) checklist. BMC Medical Research Methodology.  
391 2022;22(1).10.1186/s12874-022-01640-7
- 392 18. Damschroder LJ, Reardon CM, Widerquist MAO, et al. The updated Consolidated Framework  
393 for Implementation Research based on user feedback. Implementation Science.  
394 2022;17(1).10.1186/s13012-022-01245-0
- 395 19. Clark E, Maccrosain A, Ward NS, et al. The key features and role of peer support within  
396 group self-management interventions for stroke? A systematic review. Disability and Rehabilitation.  
397 2020;42(3):307-16.10.1080/09638288.2018.1498544
- 398 20. NHS England and NHS Improvement. 2022/23 priorities and operational planning guidance.  
399 [Internet] 2022. Available from: [https://www.england.nhs.uk/wp-](https://www.england.nhs.uk/wp-content/uploads/2022/02/20211223-B1160-2022-23-priorities-and-operational-planning-guidance-v3.2.pdf)  
400 [content/uploads/2022/02/20211223-B1160-2022-23-priorities-and-operational-planning-guidance-](https://www.england.nhs.uk/wp-content/uploads/2022/02/20211223-B1160-2022-23-priorities-and-operational-planning-guidance-v3.2.pdf)  
401 [v3.2.pdf](https://www.england.nhs.uk/wp-content/uploads/2022/02/20211223-B1160-2022-23-priorities-and-operational-planning-guidance-v3.2.pdf) [accessed 30 March 2023]
- 402 21. NHS England. National Stroke Service Model: Integrated Stroke Delivery Networks. [Internet]  
403 2021. Available from: [https://www.england.nhs.uk/wp-content/uploads/2021/05/stroke-service-](https://www.england.nhs.uk/wp-content/uploads/2021/05/stroke-service-model-may-2021.pdf)  
404 [model-may-2021.pdf](https://www.england.nhs.uk/wp-content/uploads/2021/05/stroke-service-model-may-2021.pdf) [accessed 30 March 2023]
- 405 22. EuroQol Research Foundation. EQ-5D-3L User Guide. [Internet] 2018. Available from:  
406 <https://euroqol.org/publications/user-guides> [accessed 30 March 2023]
- 407 23. Stratford P, Gill C, Westaway M, et al. Assessing Disability and Change on Individual Patients:  
408 A Report of a Patient Specific Measure. Physiotherapy Canada. 1995;47(4):258-  
409 63.10.3138/ptc.47.4.258
- 410 24. Lancashire Independent Economic Review. Deep Dive: Health, Wealth & Wellbeing.  
411 [Internet] 2021. Available from: [https://www.lancashireier.org/wp-](https://www.lancashireier.org/wp-content/uploads/2021/12/LIER_Health_Wealth_and_Wellbeing_2021_v1.pdf)  
412 [content/uploads/2021/12/LIER\\_Health\\_Wealth\\_and\\_Wellbeing\\_2021\\_v1.pdf](https://www.lancashireier.org/wp-content/uploads/2021/12/LIER_Health_Wealth_and_Wellbeing_2021_v1.pdf) [accessed 30 March  
413 2023]
- 414 25. English C, Ceravolo MG, Dorsch S, et al. Telehealth for rehabilitation and recovery after  
415 stroke: State of the evidence and future directions. International Journal of Stroke. 2022;17(5):487-  
416 93.DOI:10.1177/17474930211062480
- 417 26. Greenhalgh T, Papoutsi C. Spreading and scaling up innovation and improvement. BMJ.  
418 2019;l2068.10.1136/bmj.l2068
- 419 27. Rogers E. Diffusion of innovations: 5th Edition. New York: Free Press; 2003.
- 420 28. Bate P. The Health Foundation: Perspectives on context. [Internet] 2014. Available from:  
421 <https://www.health.org.uk/sites/default/files/PerspectivesOnContextBateContextIsEverything.pdf>  
422 [accessed 30 March 2023]
- 423 29. Hawe P. Lessons from Complex Interventions to Improve Health. Annual Review of Public  
424 Health. 2015;36(1):307-23.10.1146/annurev-publhealth-031912-114421
- 425 30. Carlsson H, Rosén B, Björkman A, et al. SENSory re-learning of the UPPer limb (SENSUPP)  
426 after stroke: development and description of a novel intervention using the TIDieR checklist. Trials.  
427 2021;22(1).10.1186/s13063-021-05375-6

428

**Context: Existing healthcare system**

**Inner setting: Local conditions**

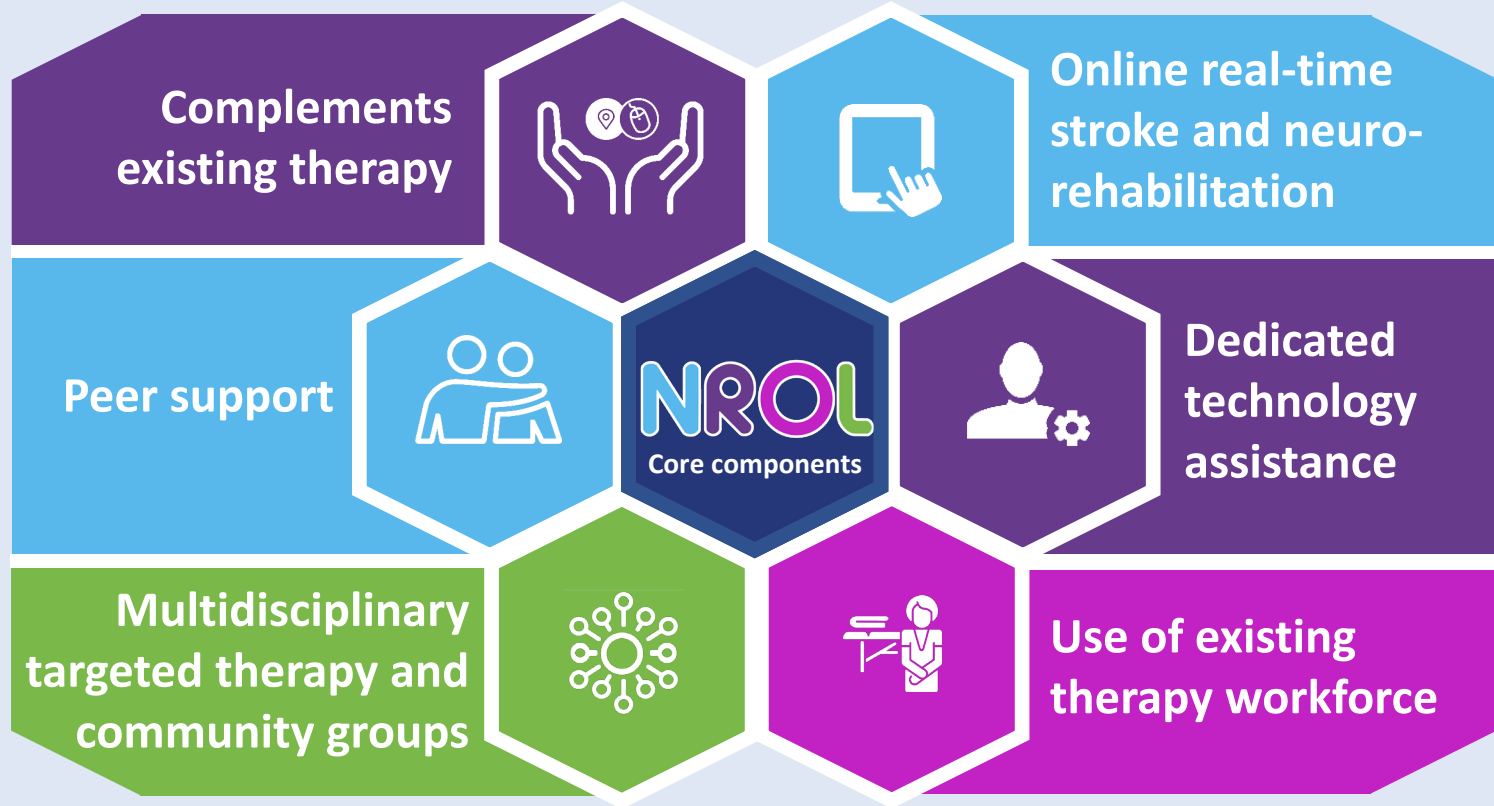

Source: https://medrxiv.org/content/10.1101/2023.02.16.23286038.full.pdf
